# Supplementary material for: A Theoretical Study of the N2 + H2 Reactive Collisions for High Vibrational and Translational Energies
Source: MDPI journal article supplement (doi:10.3390/atmos12101349), 2021-10-15
Supplement: s1 [file s1]

A theoretical study of the  $\text{N}_2 + \text{H}_2$  reactive collisions for  
high vibrational and translational energies. Supplementary  
Material

Juan de Dios Garrido and Maikel Yusat Ballester  
email: maikel.ballester@ufjf.edu.br

October 15, 2021

Table S1: Fitted coefficients to the model given by Equations (9) - (13) for the reaction  $\text{H}_2(v'') + \text{N}_2(v')$ . Units are such that the cross section in Equation (9) comes in  $\text{\AA}^2$  when energies are in  $\text{kcal mol}^{-1}$

| $v''$ | $v'$    | $a_0$                     | $b_0$      | $c_0$    | $d_0$   | $a_1$                     | $b_1$                     | $c_1$        | $d_1$      | $E_r/\text{kcal mol}^{-1}$ |
|-------|---------|---------------------------|------------|----------|---------|---------------------------|---------------------------|--------------|------------|----------------------------|
| 4     | 4, 6, 8 | $3.57419 \times 10^{-9}$  | 0.02809    | 4.89782  | 76.4703 | $3.14423 \times 10^{-11}$ | $-1.39585 \times 10^{-9}$ | -0.000840399 | -0.219901  | 29.3048                    |
| 4     | 10, 12  | $6.04411 \times 10^{-13}$ | 0.03494    | 6.82859  | 43.196  | $2.48777 \times 10^{-15}$ | $-1.41162 \times 10^{-9}$ | -0.000840399 | -0.219901  | 77.5067                    |
| 5     | 4, 6, 8 | $7.62308 \times 10^{-10}$ | 0.0271106  | 5.1576   | 44.9172 | $4.05202 \times 10^{-12}$ | $-1.3982 \times 10^{-9}$  | -0.000840399 | -0.219901  | 29.3048                    |
| 5     | 12      | $4.43611 \times 10^{-14}$ | 0.0445261  | 7.67707  | 31.3991 | $2.28779 \times 10^{-17}$ | $-1.41162 \times 10^{-9}$ | -0.000840399 | -0.219901  | 77.5067                    |
| 6     | 0 - 12  | $3.19893 \times 10^{-5}$  | 0.0246831  | 2.87158  | 54.58   | $1.86344 \times 10^{-7}$  | $-0.000144581$            | -0.00246571  | -0.080389  | 3.3276                     |
| 8     | 0 - 12  | 0.0153365                 | 0.00751311 | 1.36855  | 33.4306 | $-5.90881 \times 10^{-5}$ | $-4.41426 \times 10^{-5}$ | 0.000705679  | -0.061483  | 3.3276                     |
| 10    | 0 - 12  | 0.210423                  | 0.00743152 | 0.973406 | 18.8643 | 0.000691641               | $-2.36879 \times 10^{-5}$ | -0.000785404 | 0.00320755 | 3.3276                     |
| 12    | 0 - 12  | 3.25233                   | 0.00510684 | 0.440203 | 9.0369  | 0.0158256                 | $-2.52828 \times 10^{-5}$ | -0.00126669  | 0.00653197 | 3.3276                     |

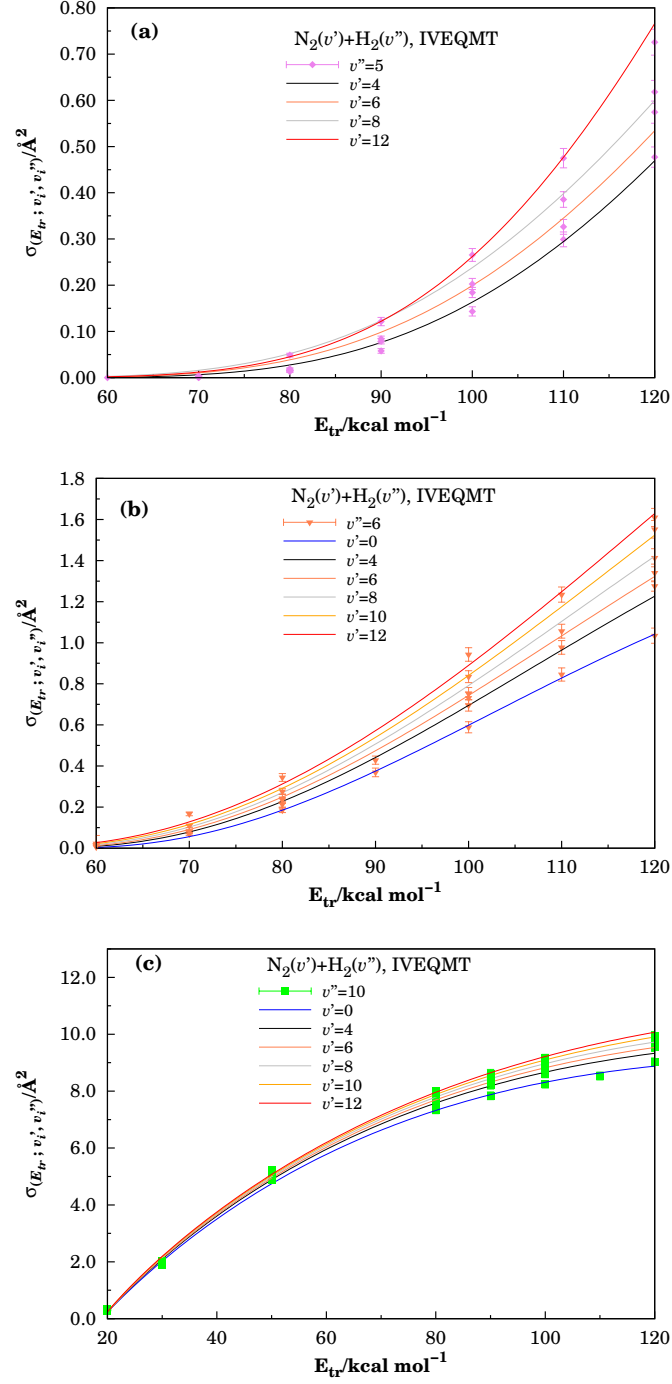

Figure S1: Specific initial-state cross section for the reaction  $\text{N}_2(v') + \text{H}_2(v'') \rightarrow \text{N}_2 + \text{H} + \text{H}$  considering the IVEQMT approach. In Panel (a)  $\text{H}_2(v''=5) + \text{N}_2(v'=4, 6, 8, 12)$ , in Panel (b)  $\text{H}_2(v''=6) + \text{N}_2(v'=0, 4, 6, 8, 10, 12)$  and in Panel (c)  $\text{H}_2(v''=10) + \text{N}_2(v'=0, 4, 6, 8, 10, 12)$ ,

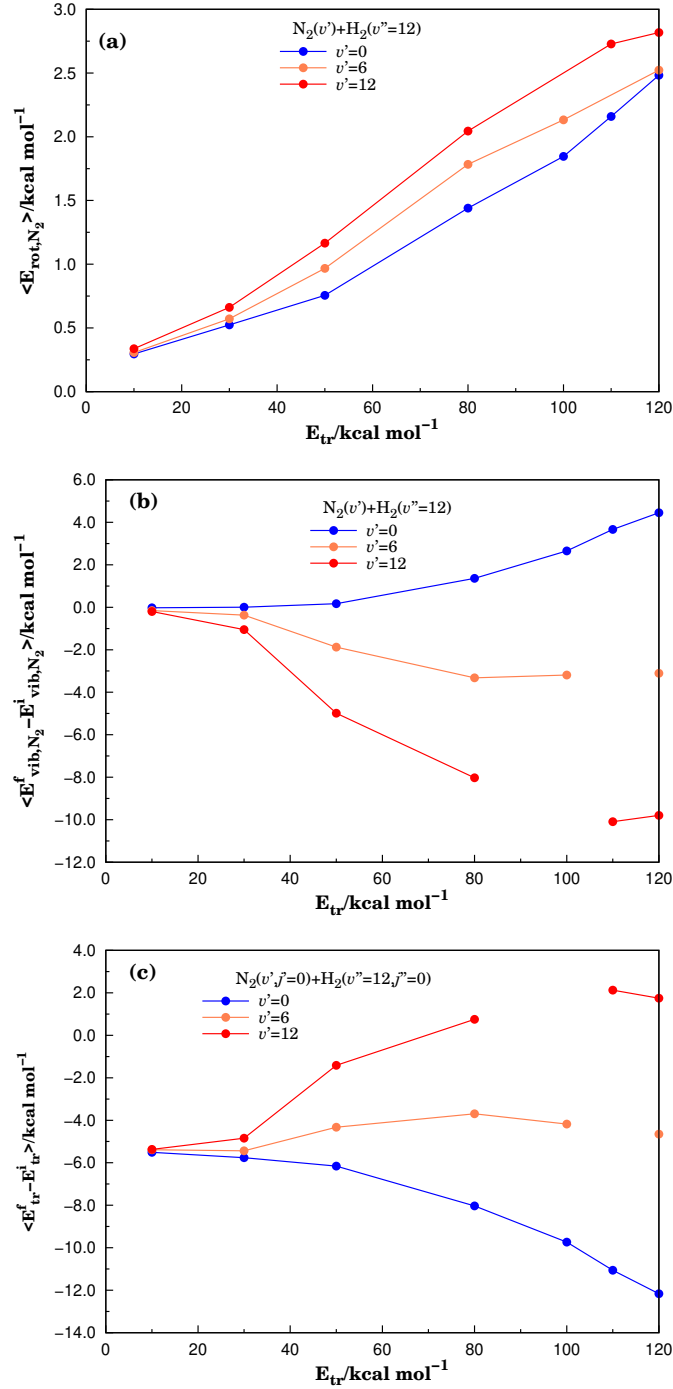

Figure S2: Comparison of the arithmetic mean of energies for different degrees of freedom in the reaction  $N_2(v' = 0, 6, 12) + H_2(v'' = 12) \rightarrow N_2 + H + H$  within the IVEQMT approach versus translational energies. In Panel (a) are displayed the mean values of the rotational energy for the product  $N_2$ . In Panel (b) the differences between the mean values of the vibrational energy for the  $N_2$  after reaction and the corresponding initial value are shown. In Panel (c) the difference between mean values of the relative translational energy of the molecular system after reaction and the corresponding initial values are presented.

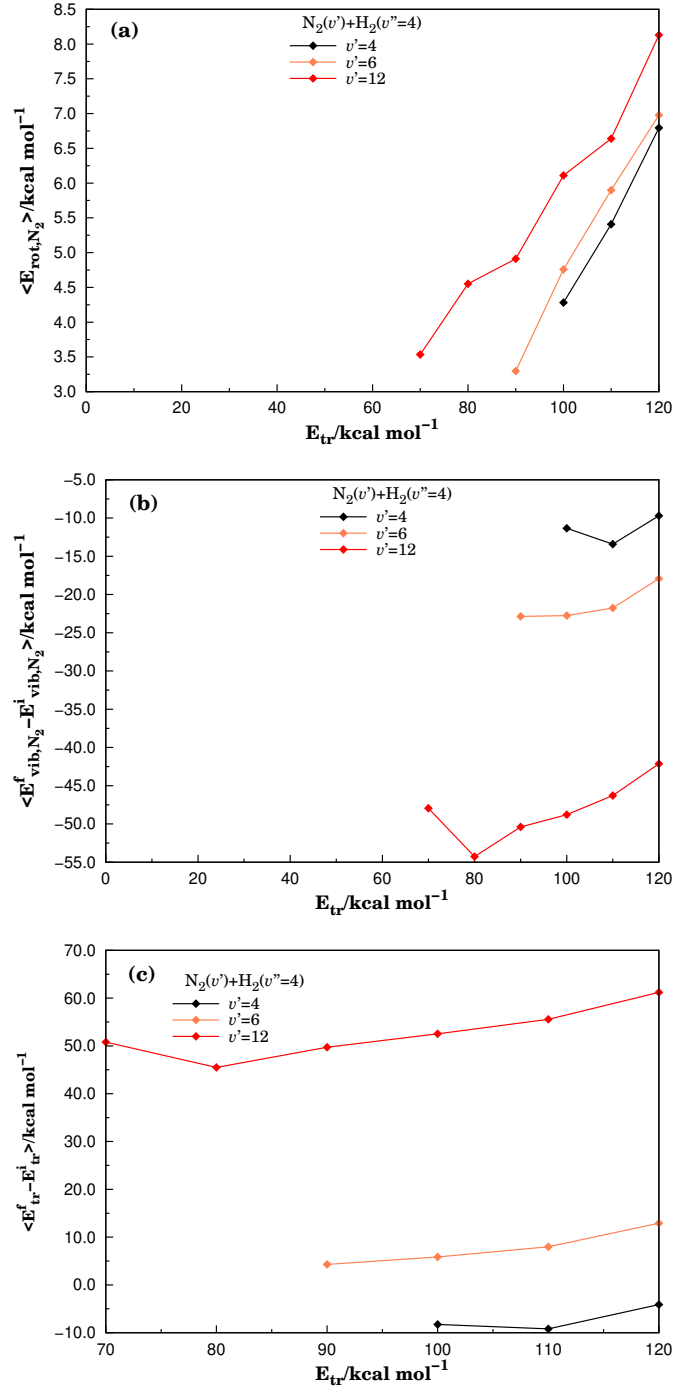

Figure S3: Comparison of the arithmetic mean of energies for different degrees of freedom in the reaction  $N_2(v' = 4, 6, 12) + H_2(v'' = 4) \rightarrow N_2 + H + H$  within the IVEQMT approach versus translational energies. In Panel (a) are displayed the mean values of the rotational energy for the product  $N_2$ . In Panel (b) the differences between the mean values of the vibrational energy for the  $N_2$  after reaction and the corresponding initial value are shown. In Panel (c) the difference between mean values of the relative translational energy of the molecular system after reaction and the corresponding initial values are presented.

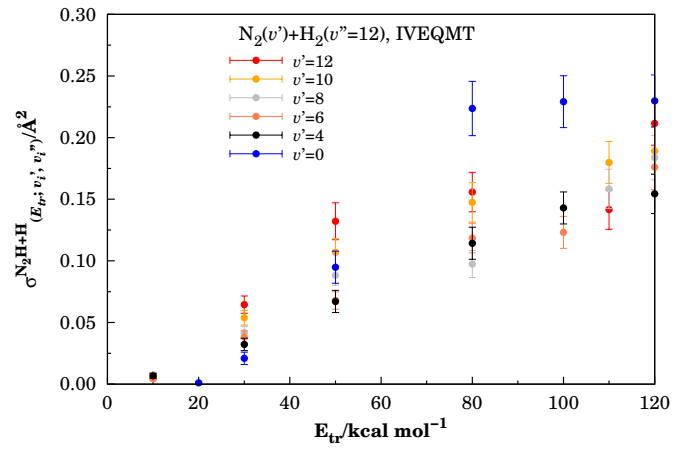

Figure S4: Specific initial-state reactive cross section for the N<sub>2</sub>H + H formation considering the reactive collisions H<sub>2</sub>( $v'' = 12$ ) + N<sub>2</sub>( $v' = 0, 4, 6, 8, 10, 12$ ) in the frame of the IVEQMT approach.
