# Supplementary figures and images for: A Theoretical Study of the N2 + H2 Reactive Collisions for High Vibrational and Translational Energies
Source: MDPI journal article supplement (doi:10.3390/atmos12101349), 2021-10-15

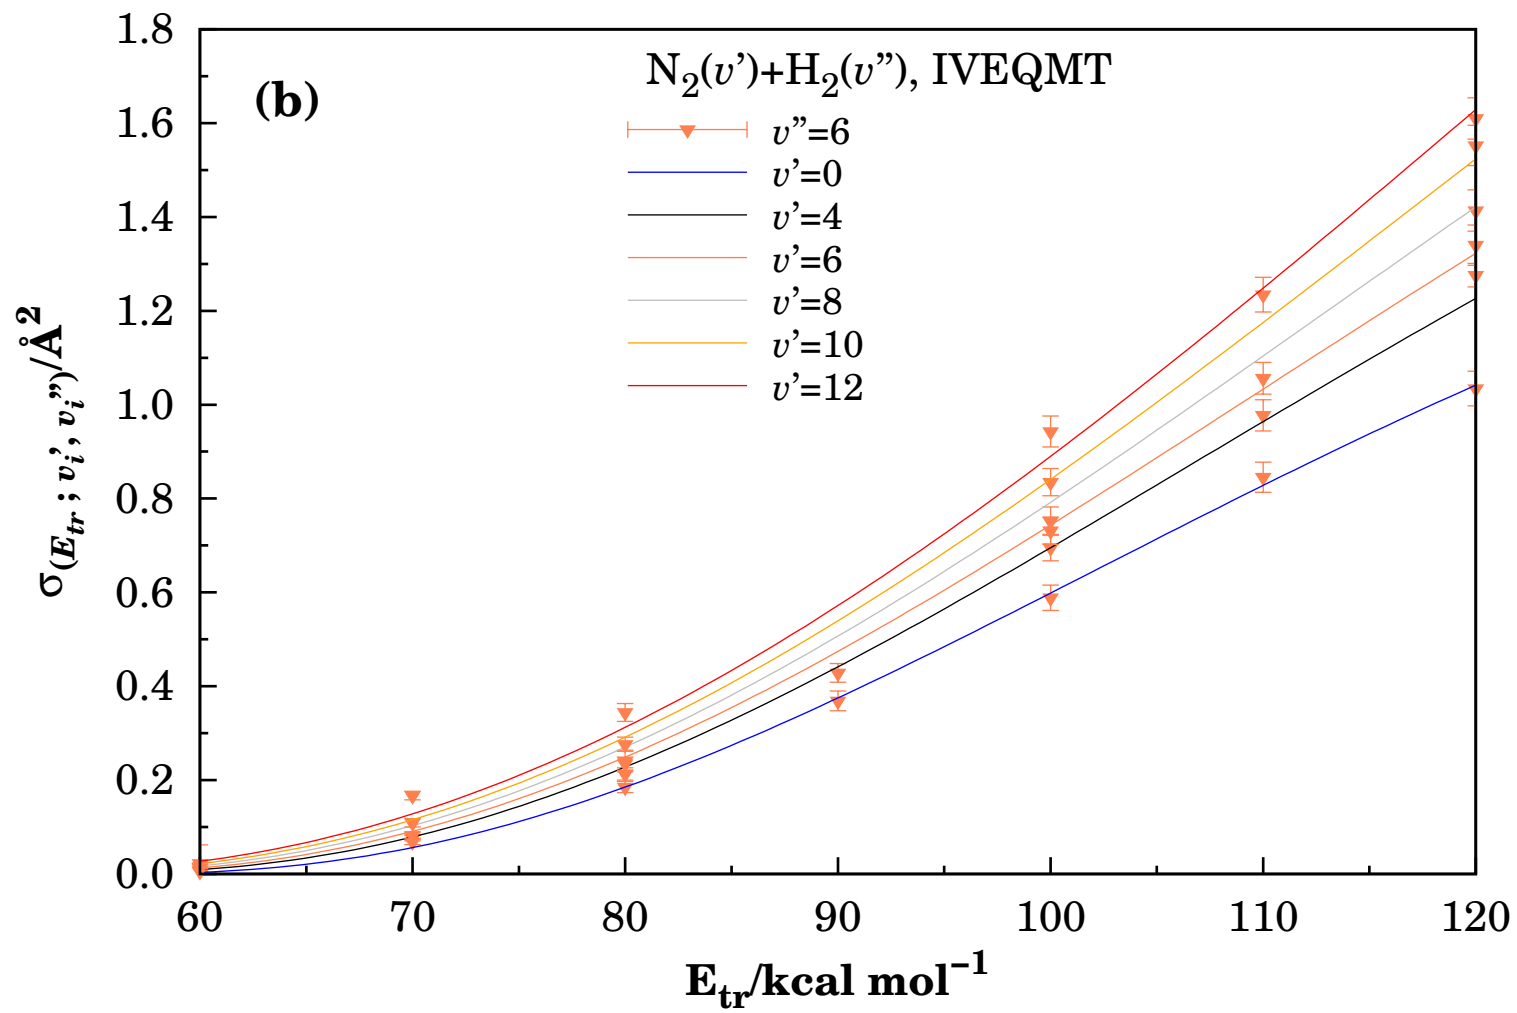

Supplement: s1 [file s1]

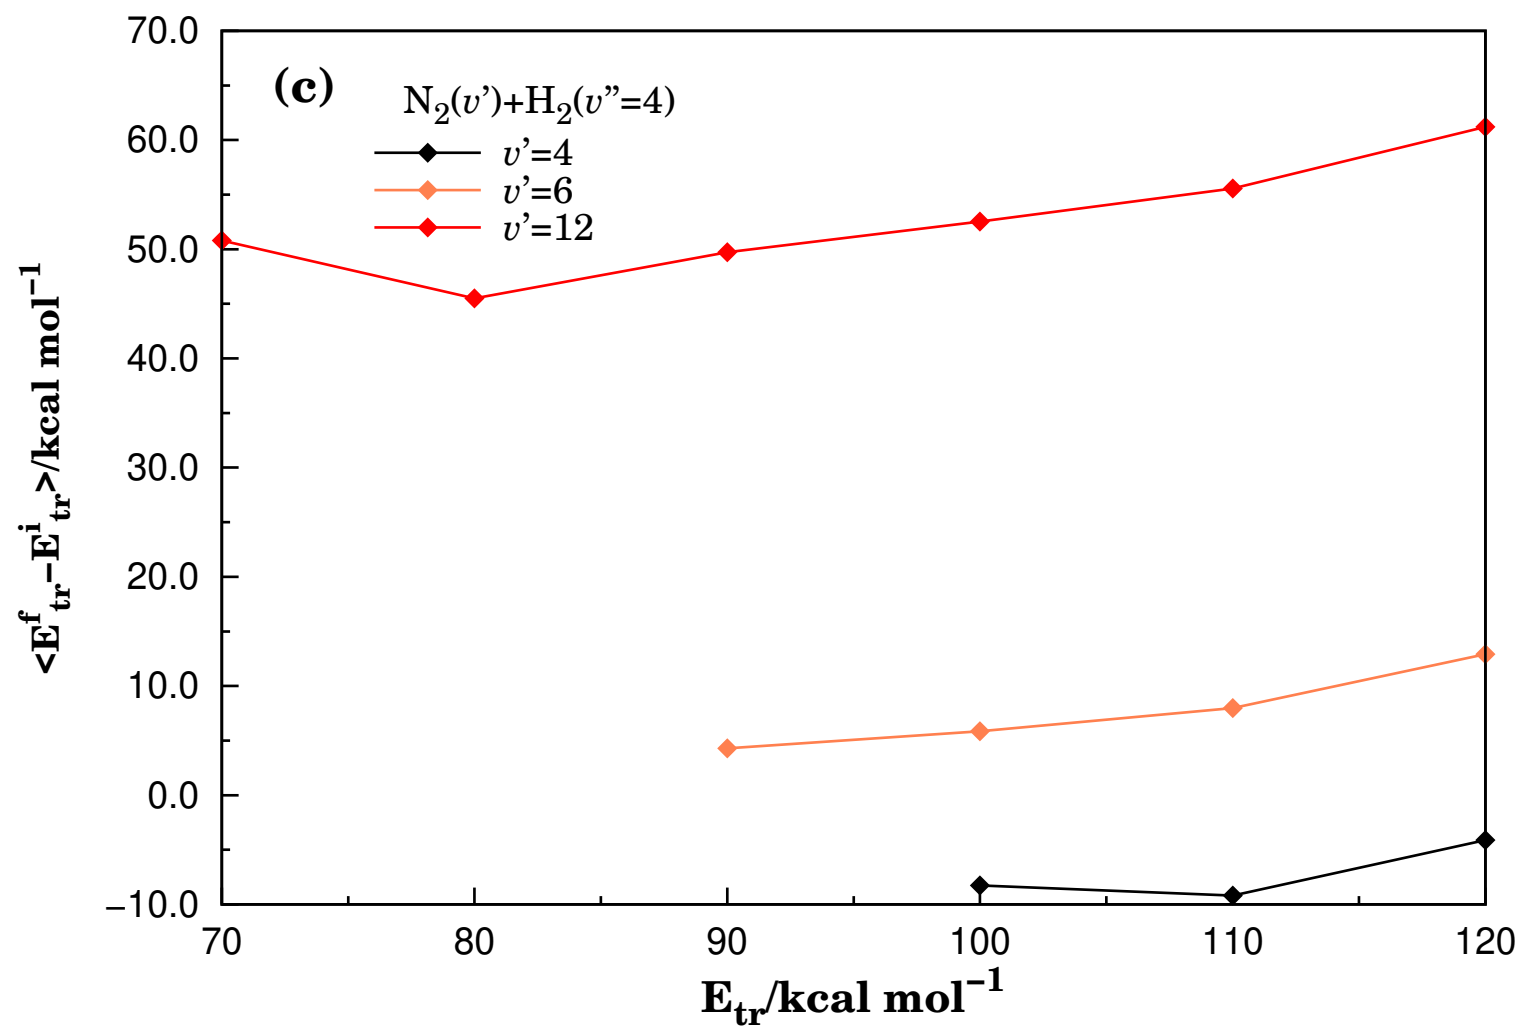

Supplement: s1 [file s1]

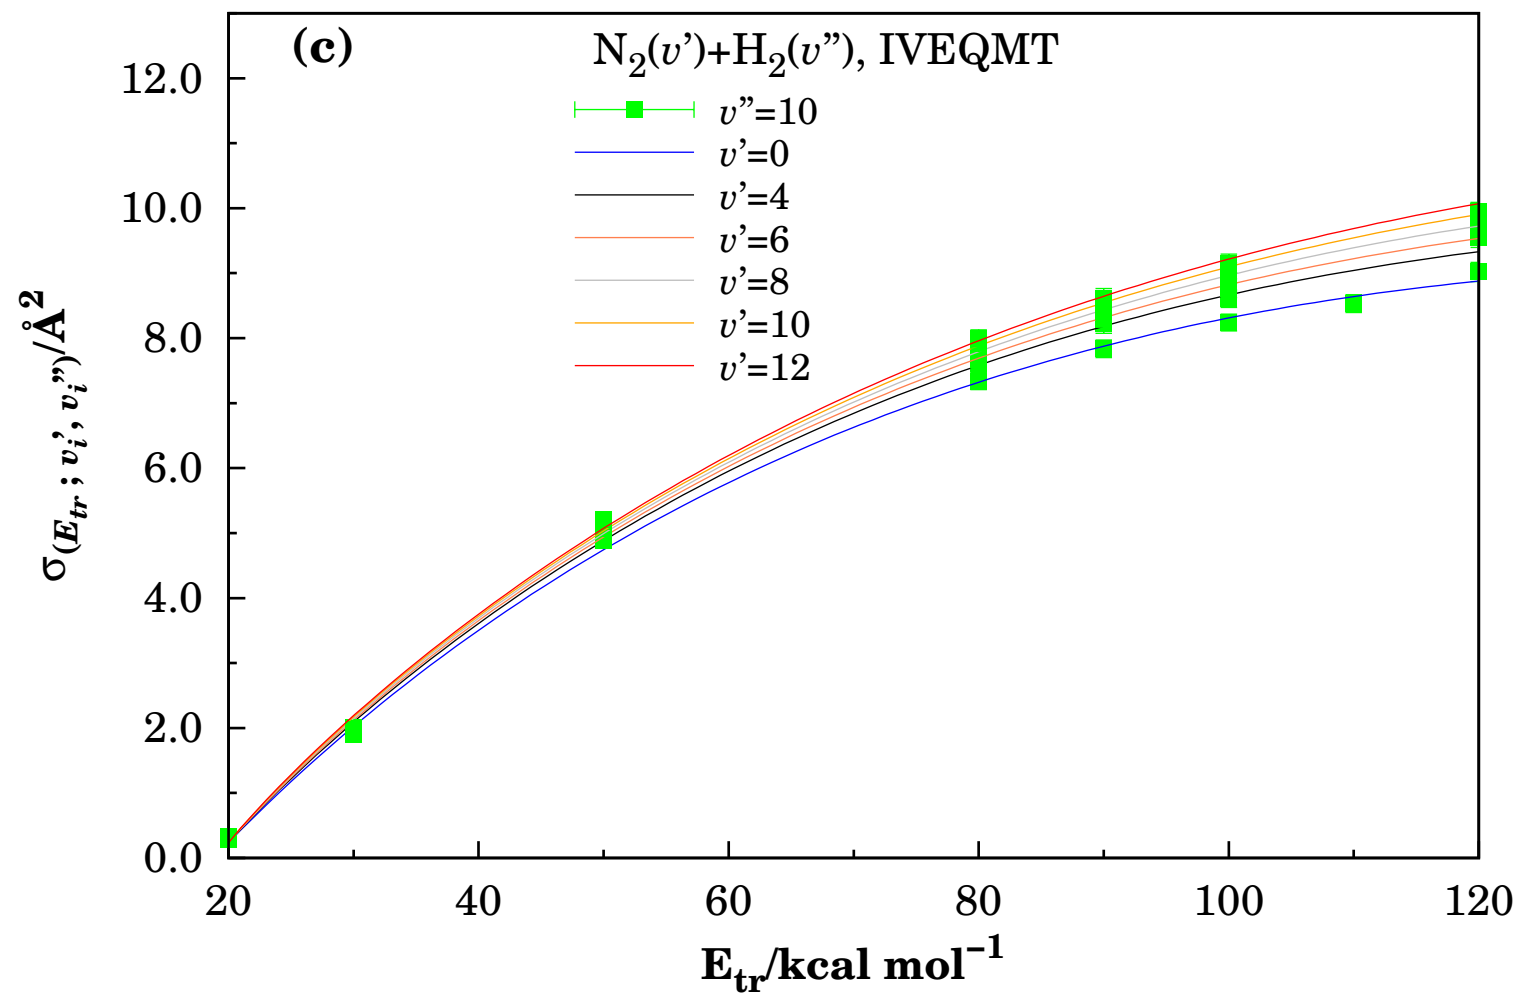

Supplement: s1 [file s1]

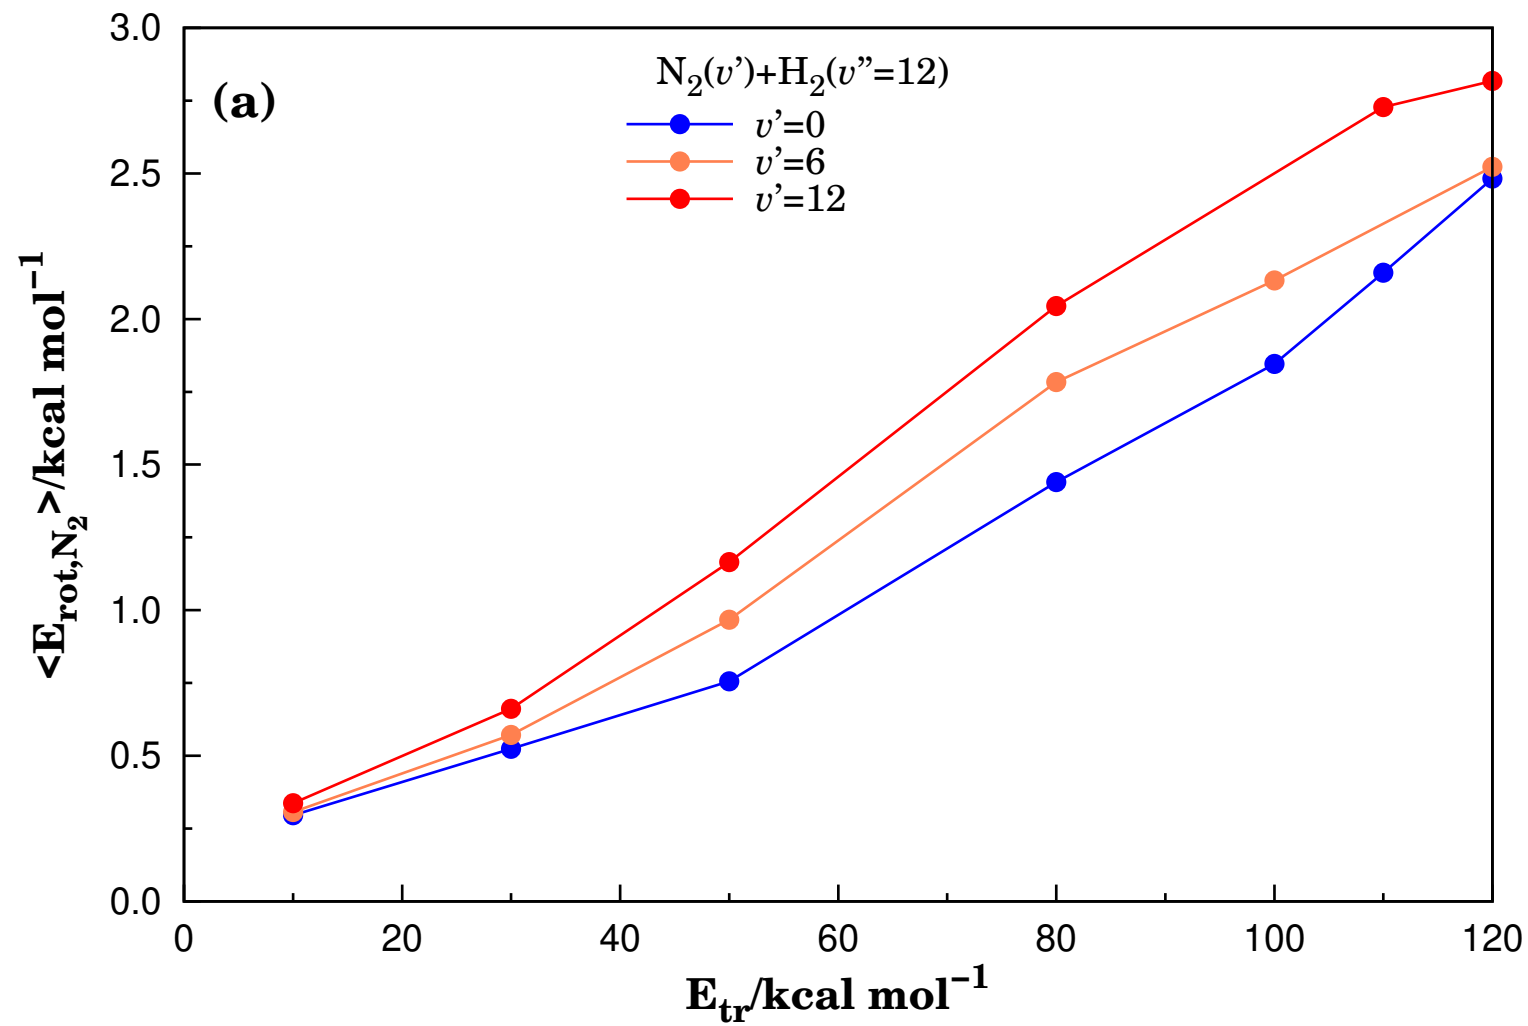

Supplement: s1 [file s1]

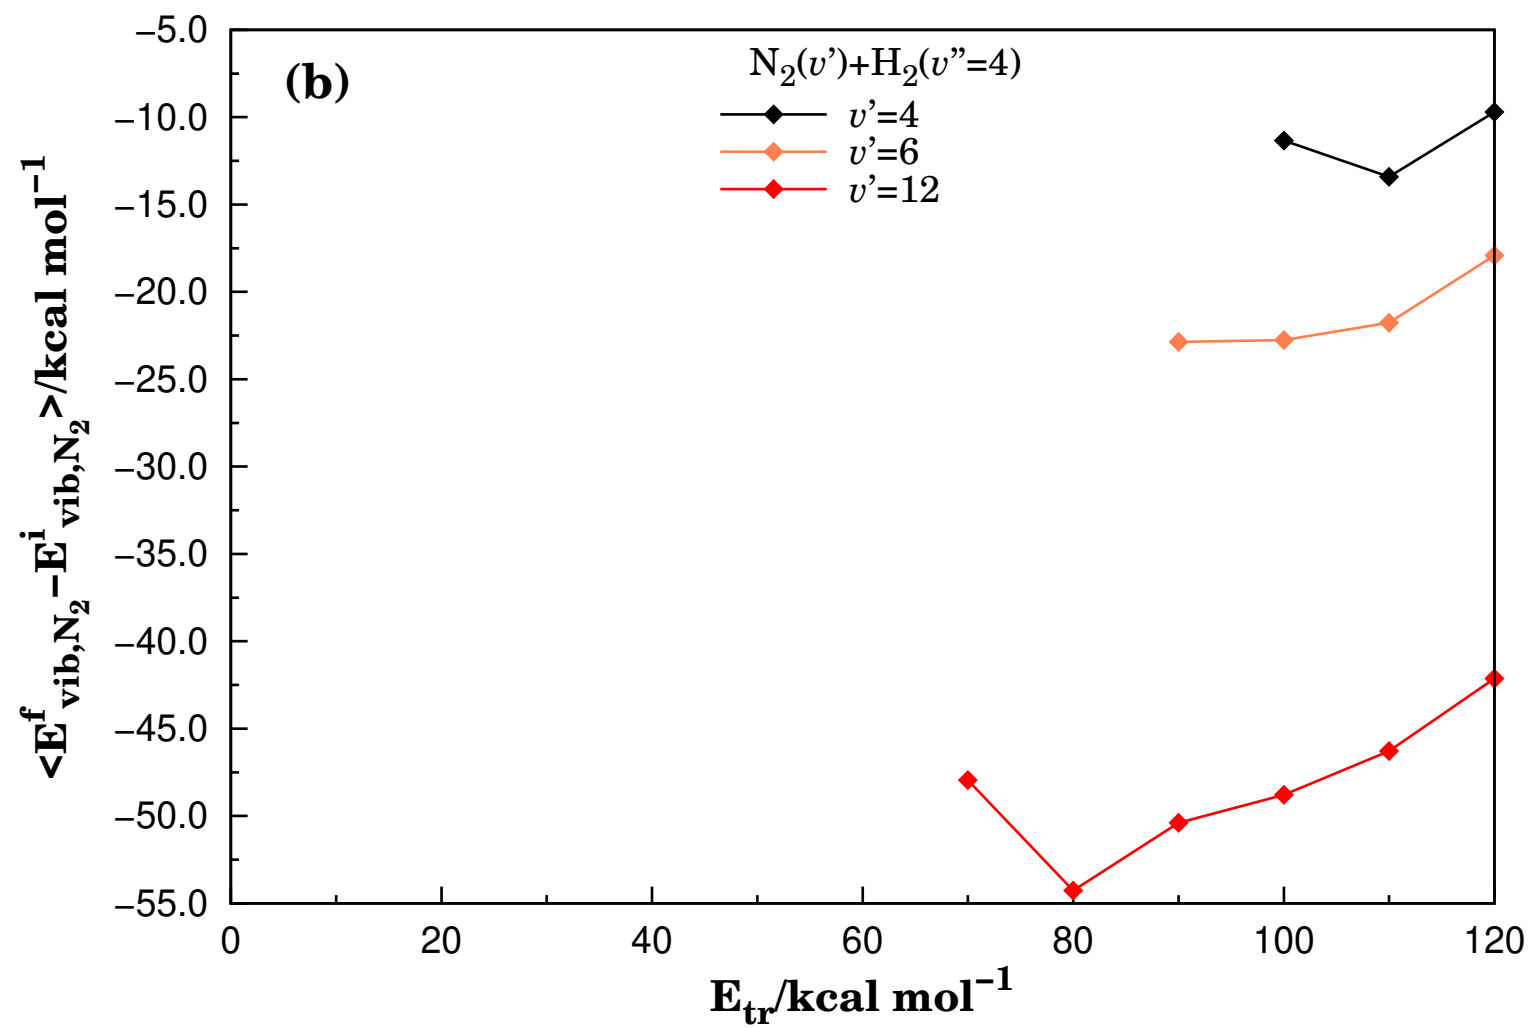

Supplement: s1 [file s1]

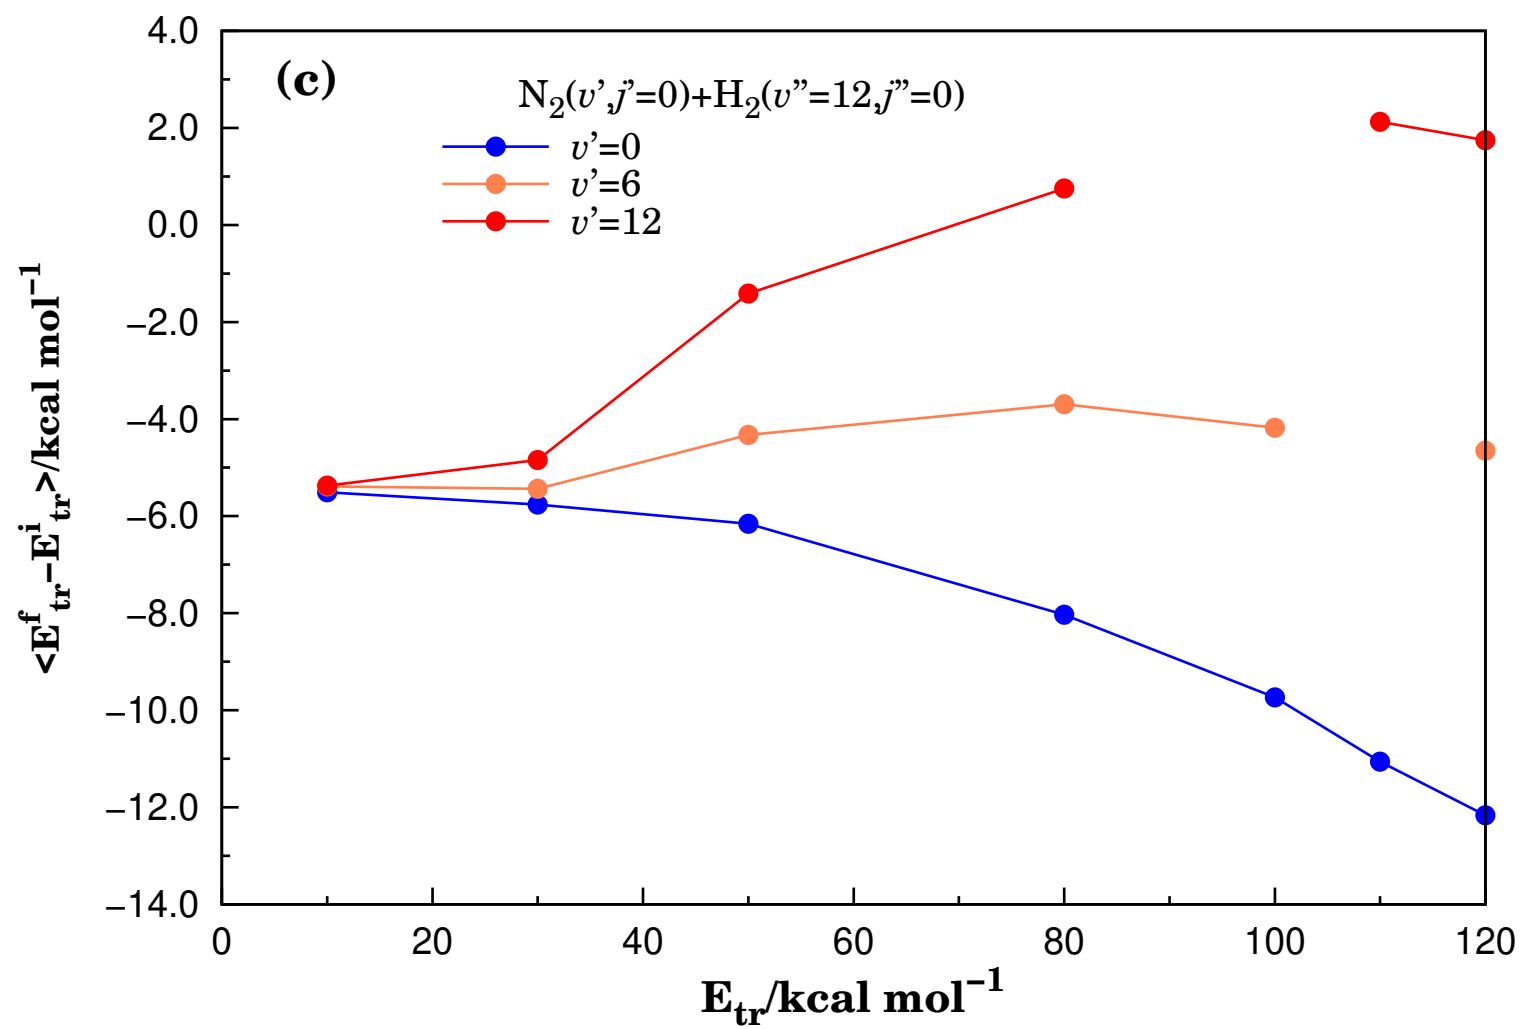

Supplement: s1 [file s1]

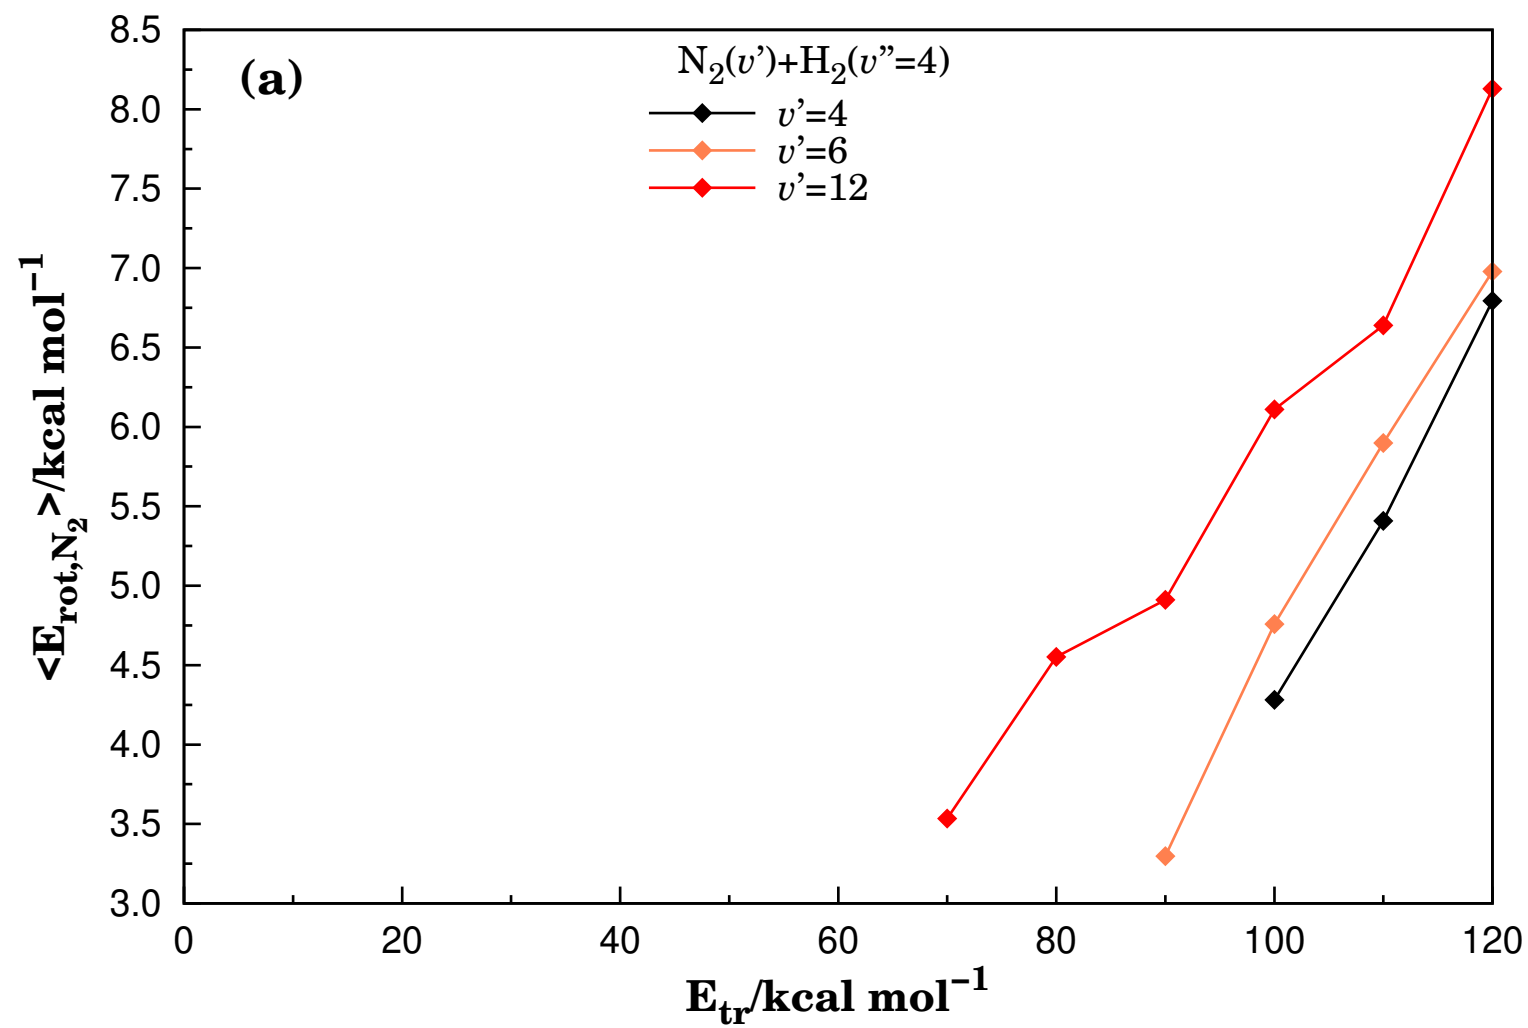

Supplement: s1 [file s1]

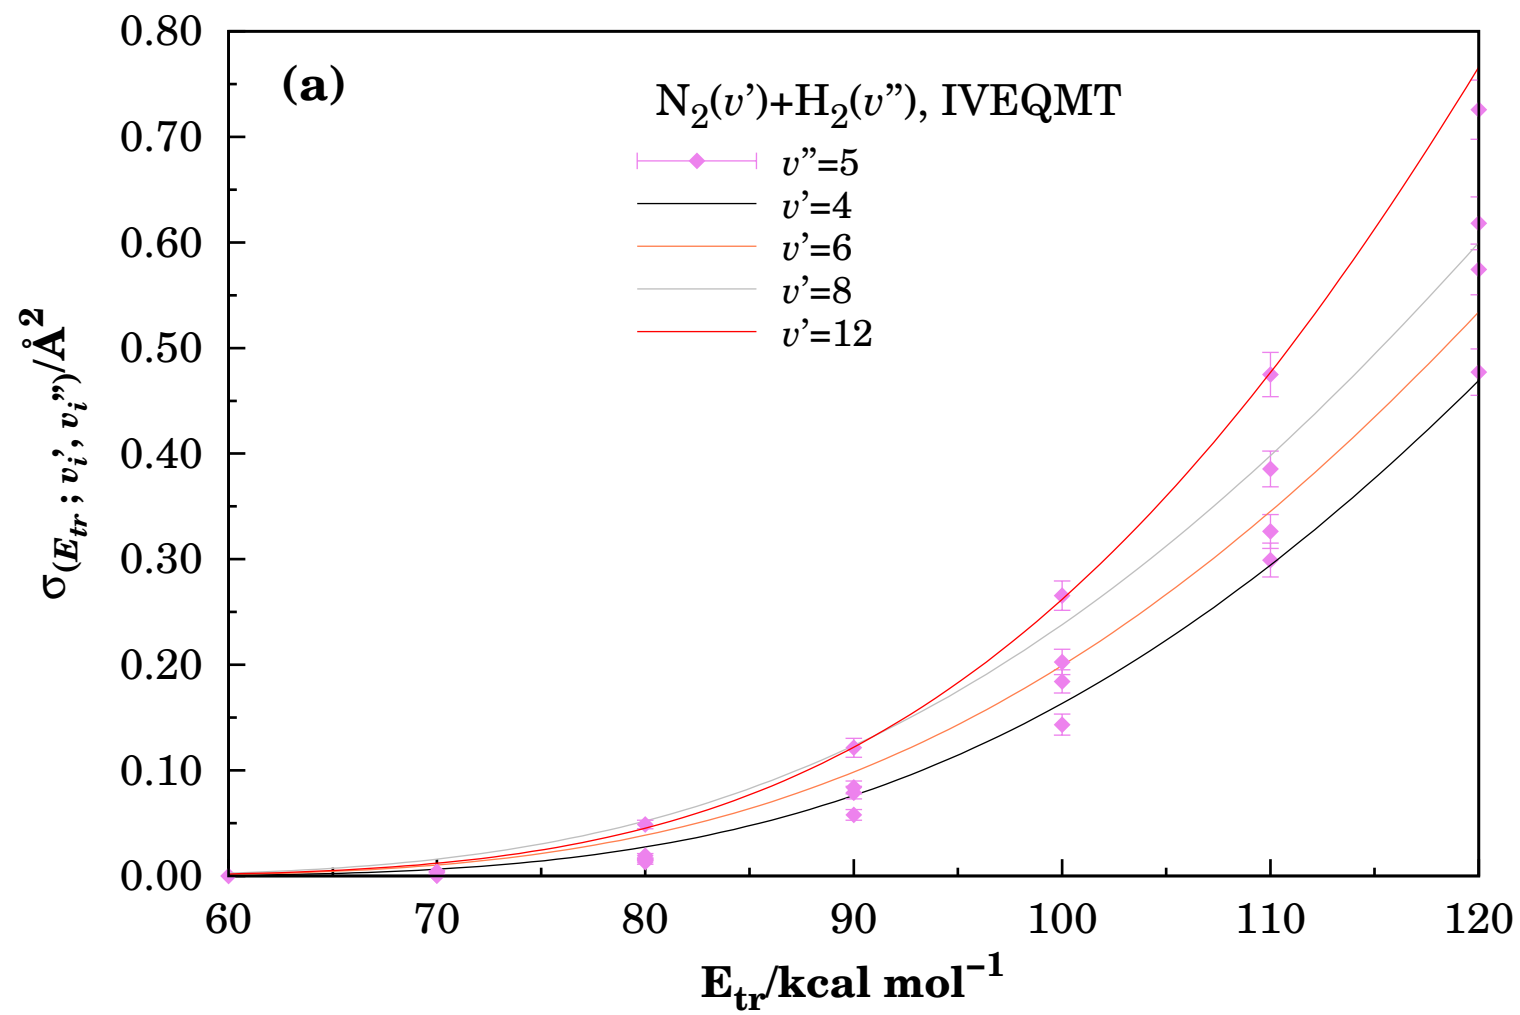

Supplement: s1 [file s1]

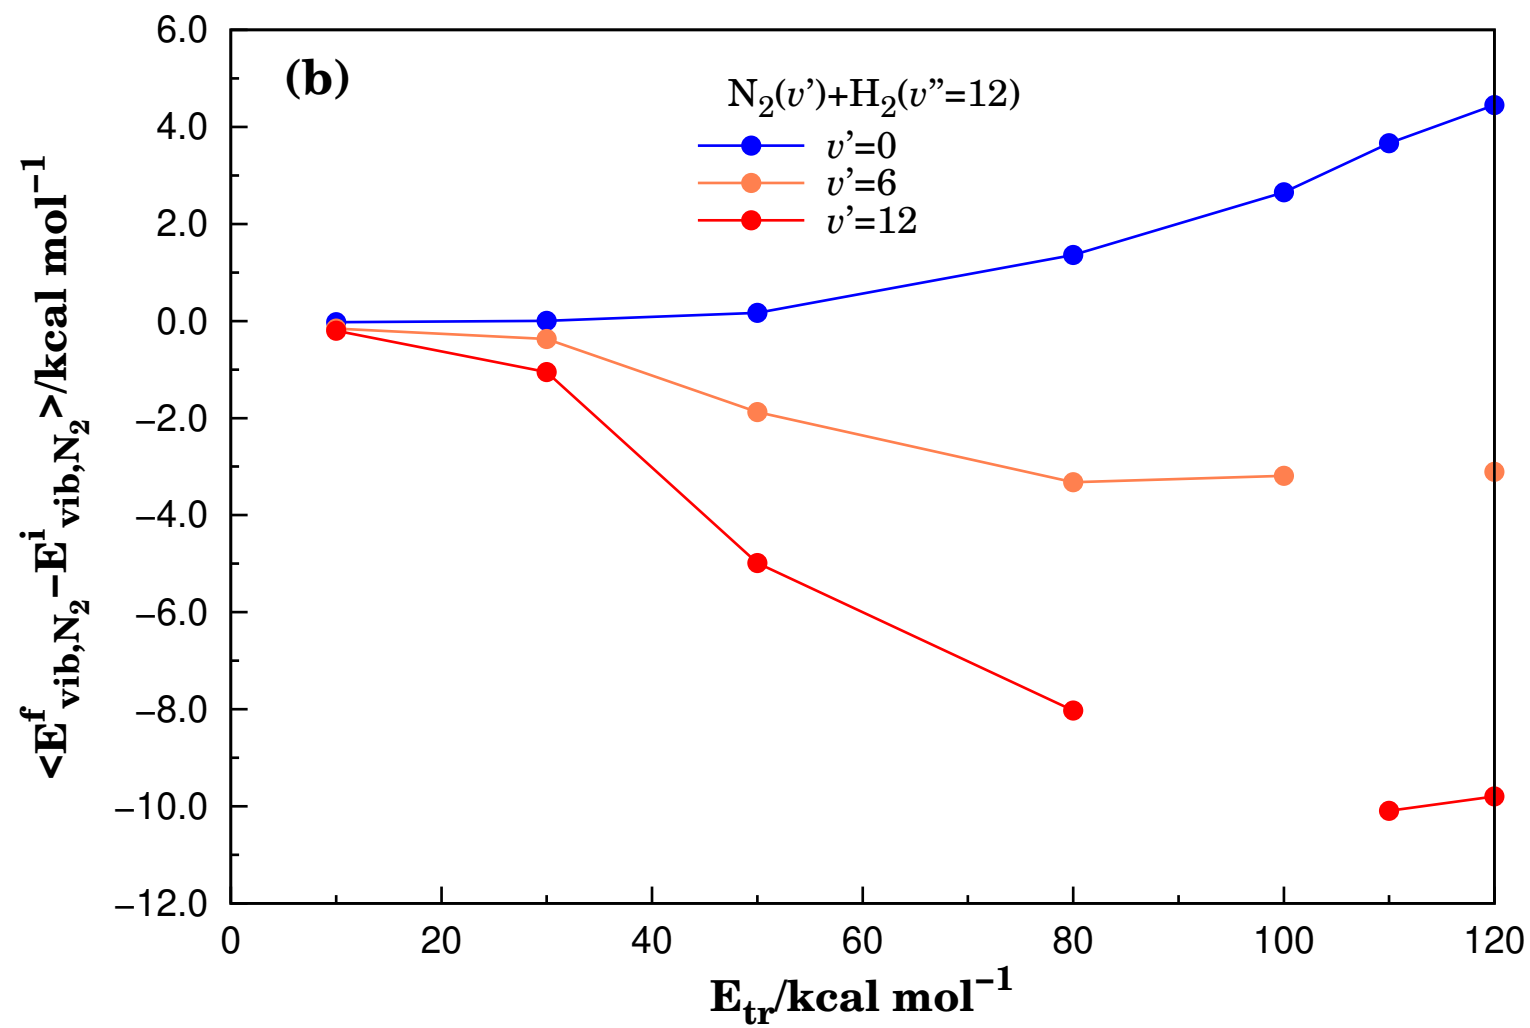

Supplement: s1 [file s1]

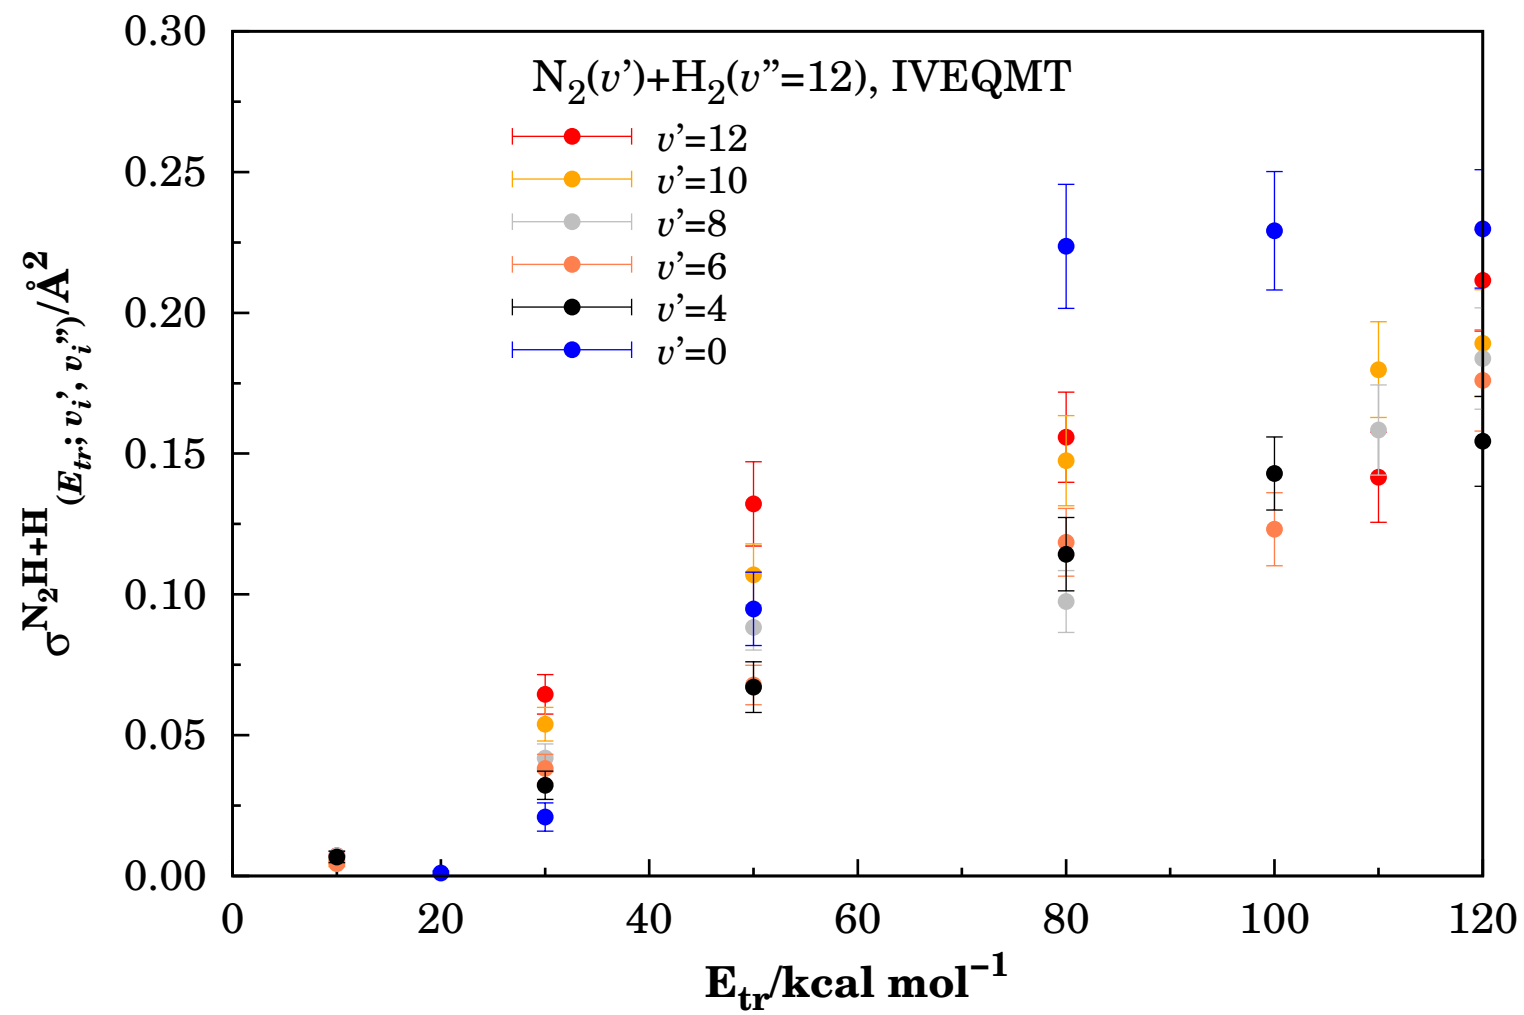

Supplement: s1 [file s1]
